# Supplementary figures and images for: The Pharmacological Mechanism of Curcumin against Drug Resistance in Non-Small Cell Lung Cancer: Findings of Network Pharmacology and Bioinformatics Analysis
Source: Hindawi journal article supplement (doi:10.1155/2022/5926609), 2022-10-14

Figure S1

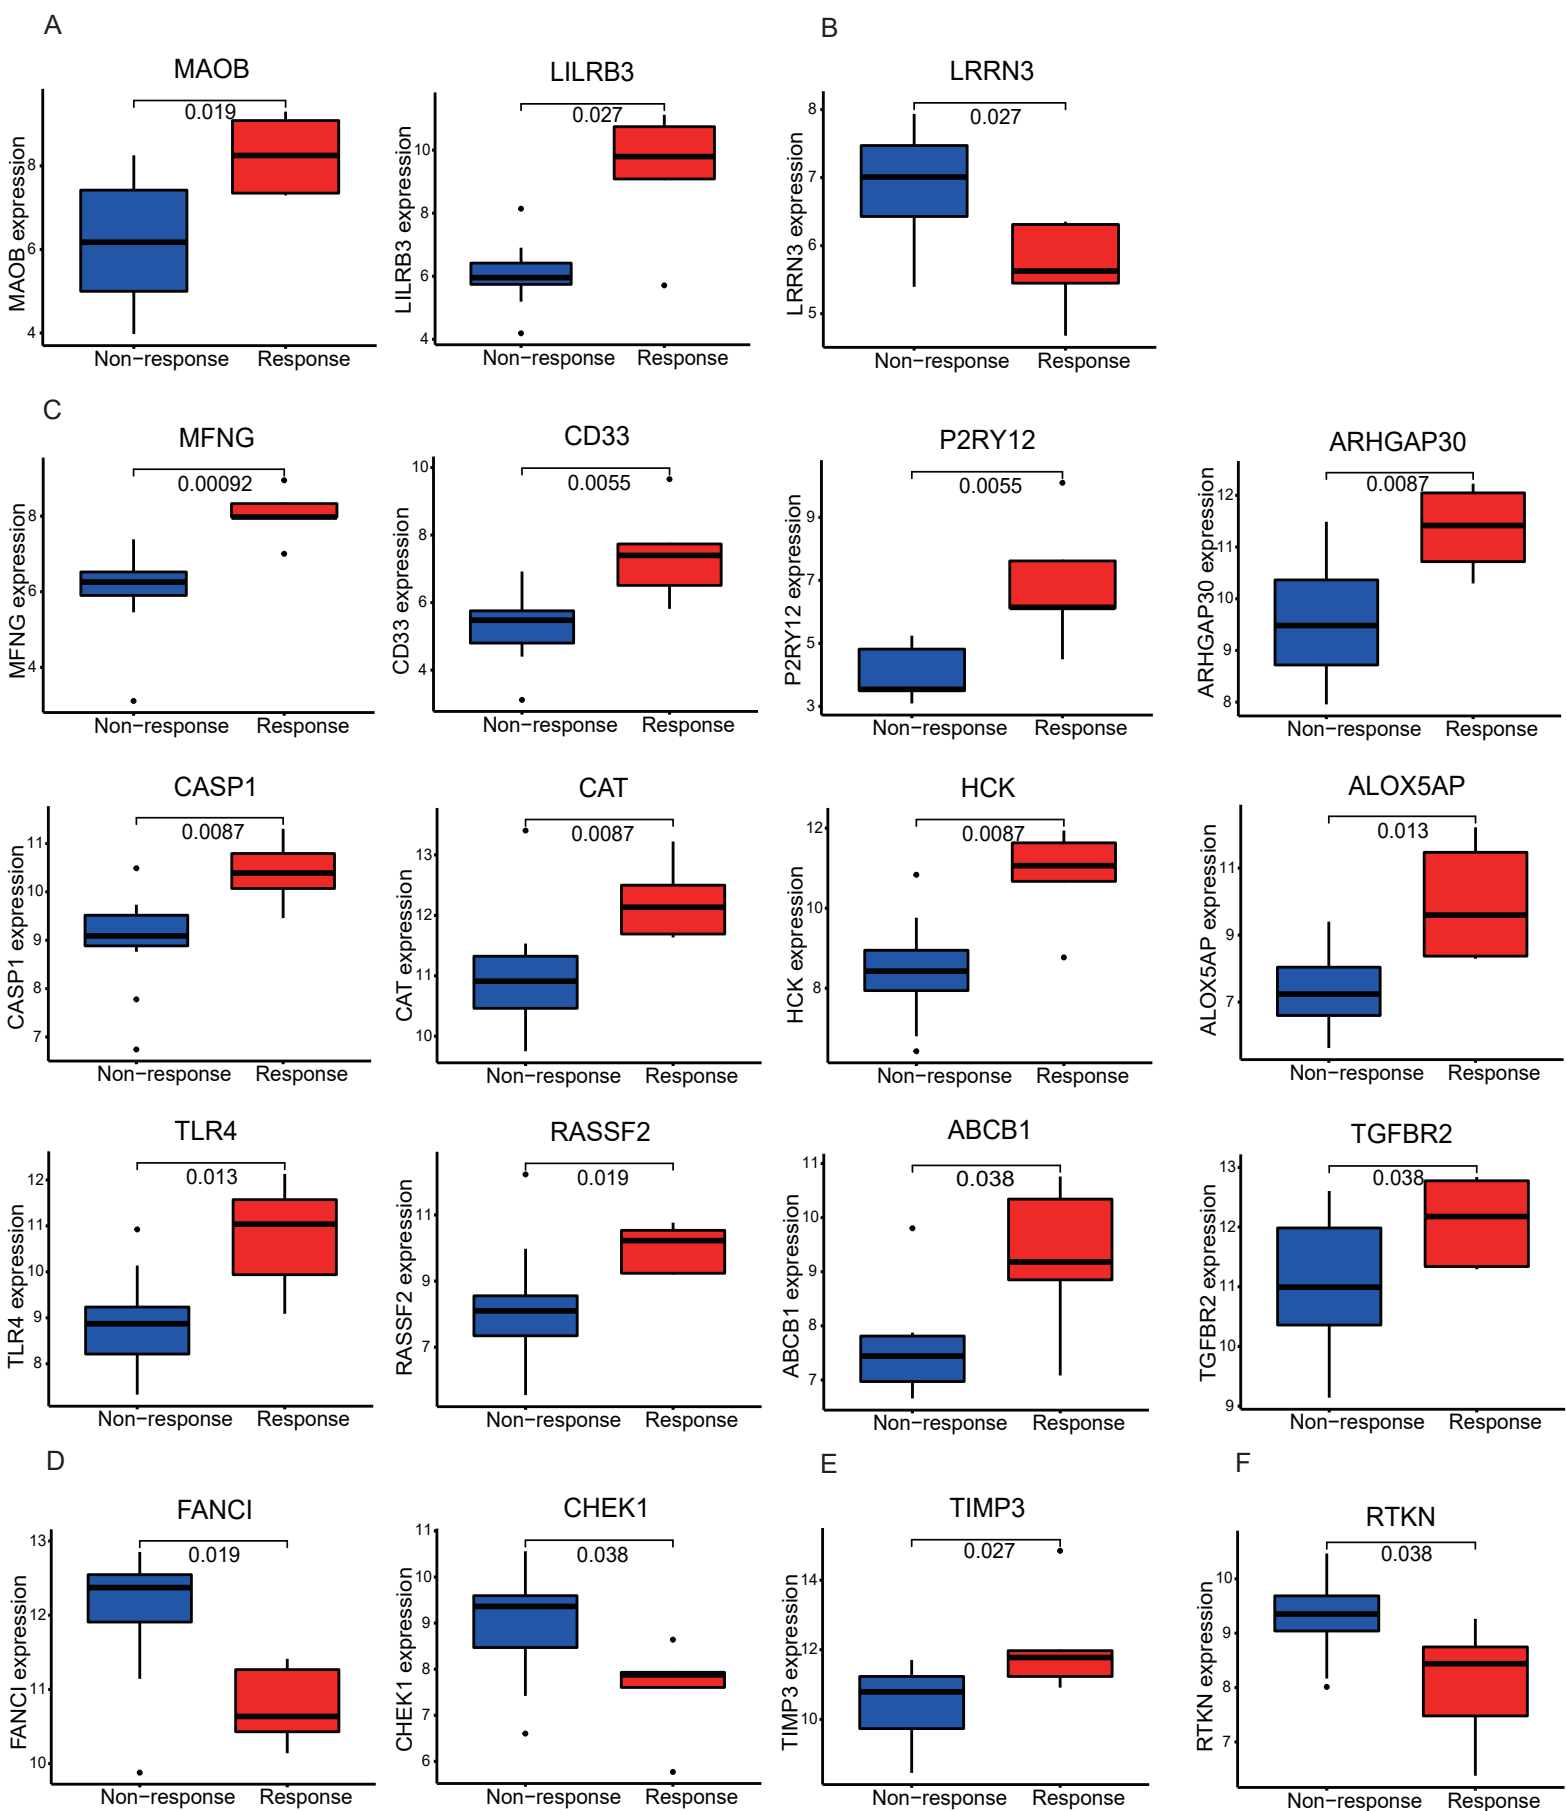

Figure S2

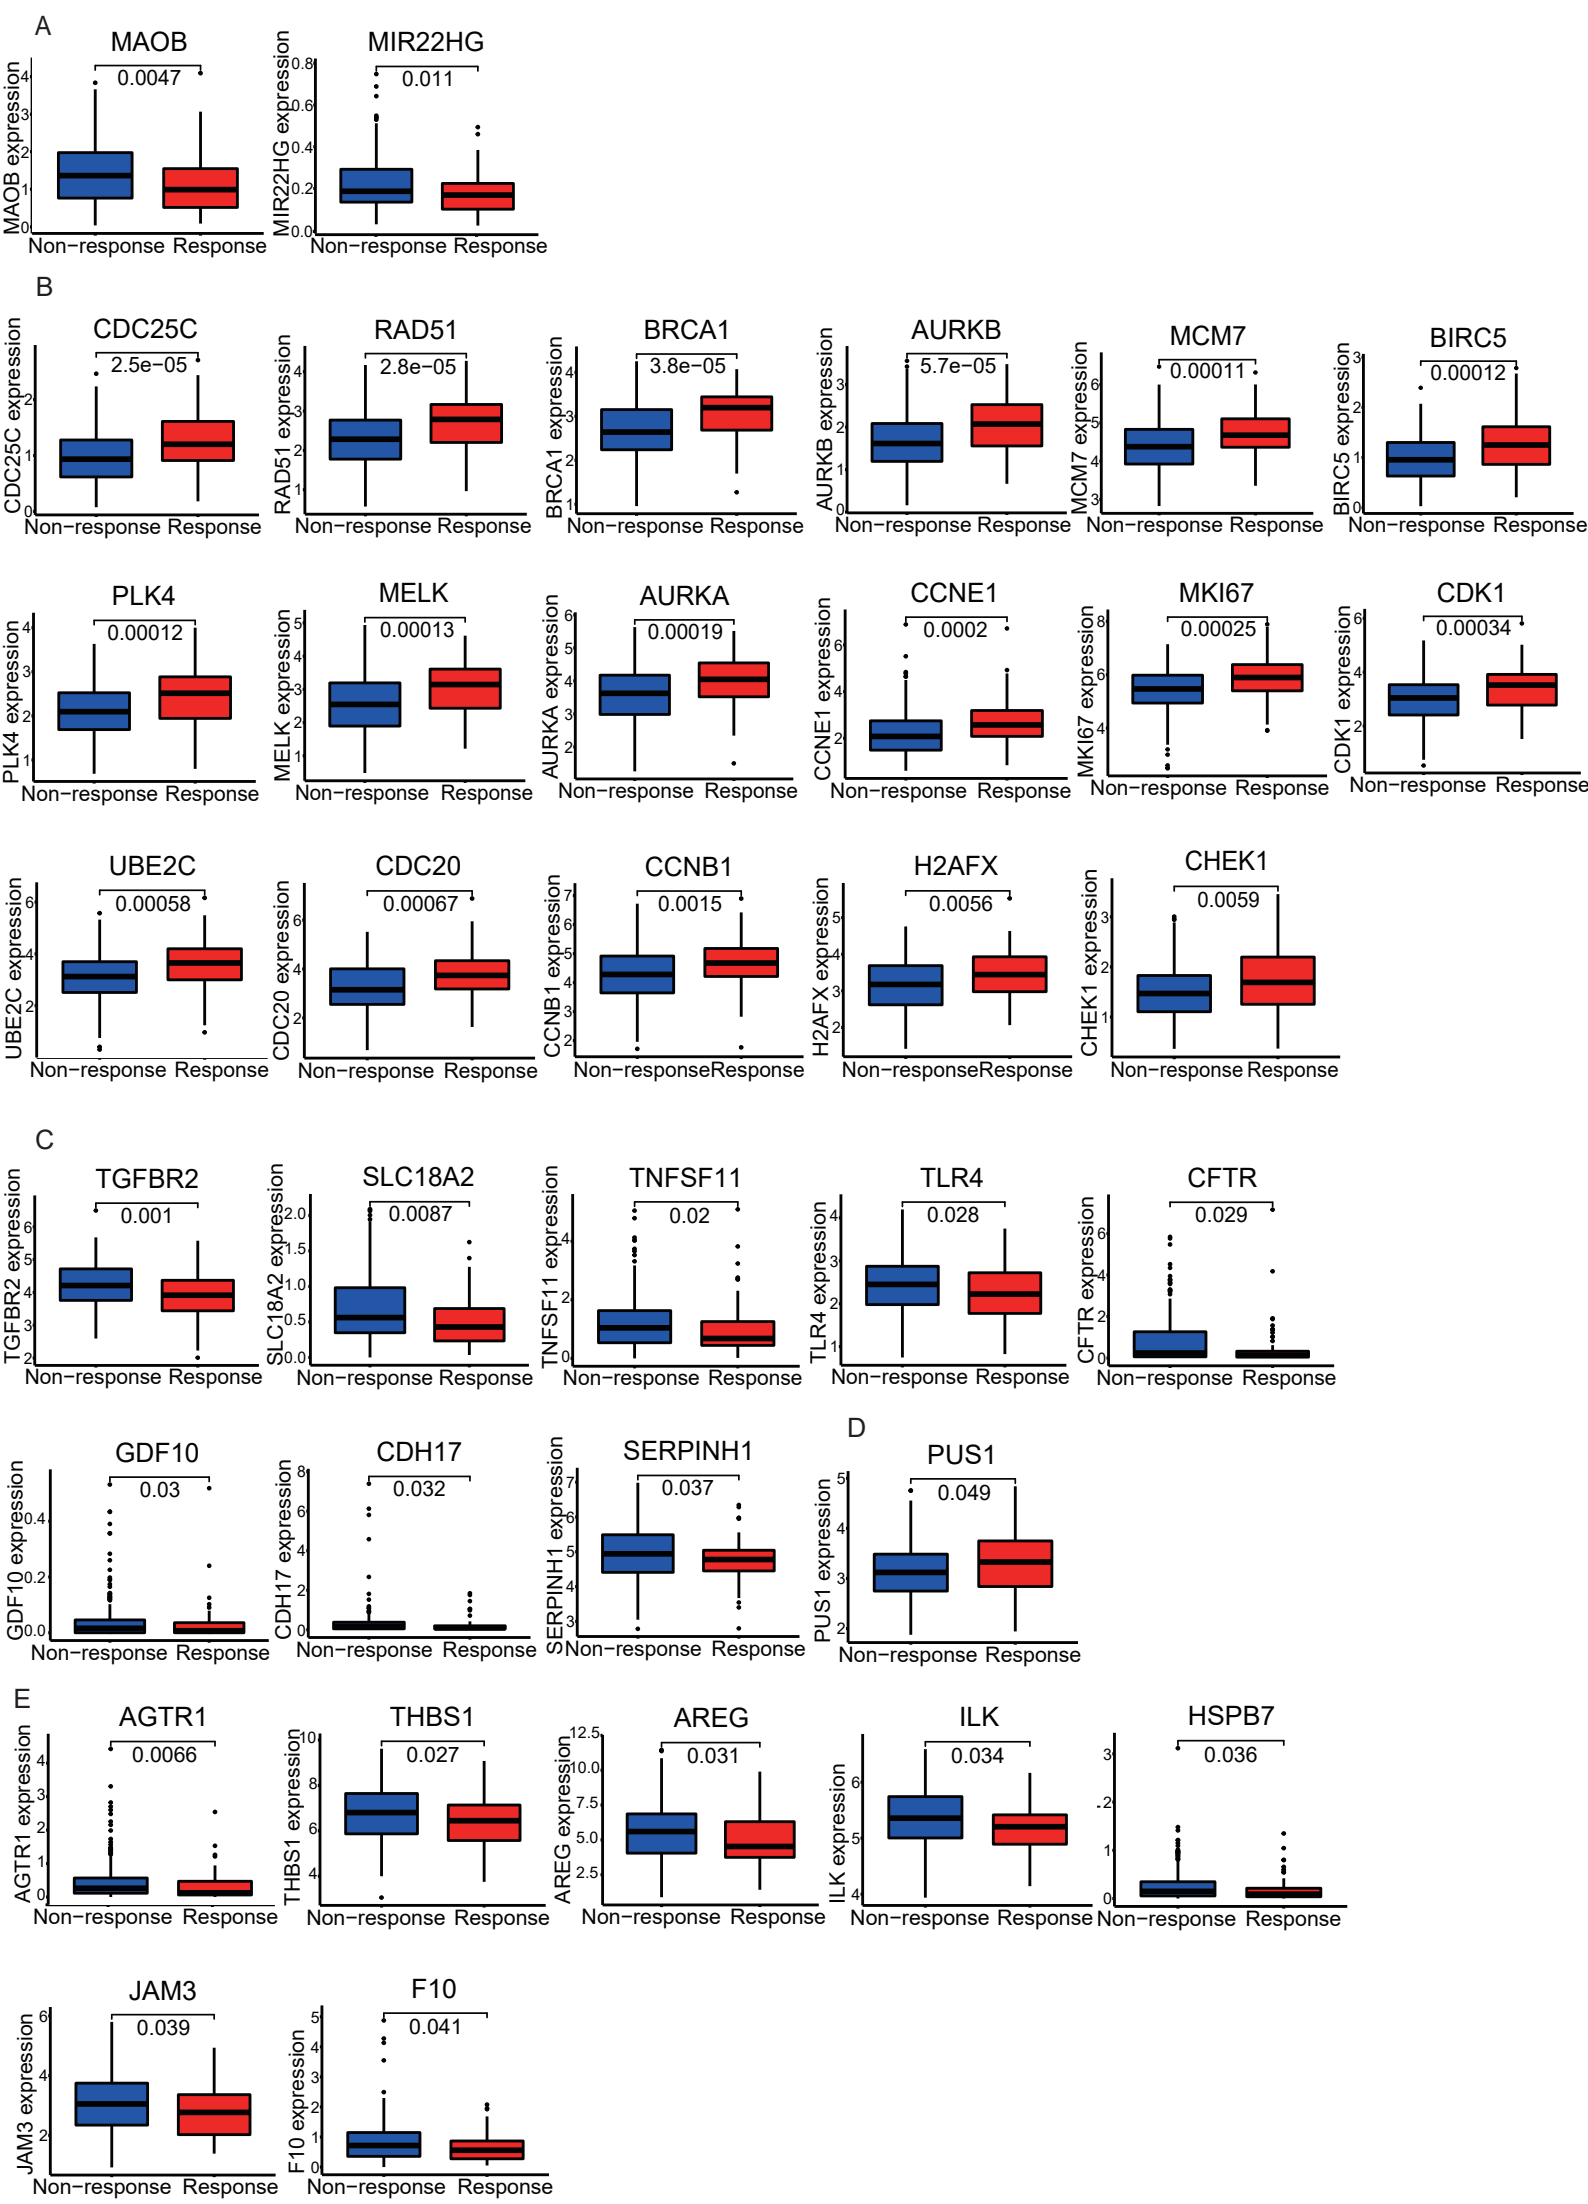

Supplement: f1 [file 5926609.f1.zip]
